# Supplementary material
Source: PubMed Central journal article supplement (PMC4518555)
Supplement: NIHMS673840-supplement-1.pdf [file NIHMS673840-supplement-1.pdf]

# Supplemental Data

**A**

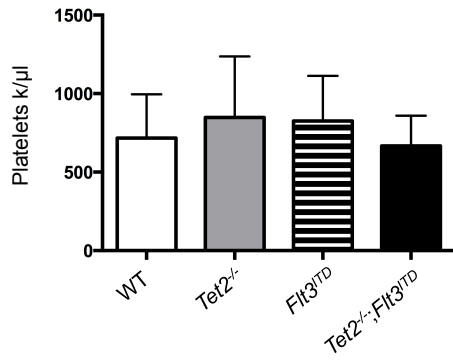

**B**

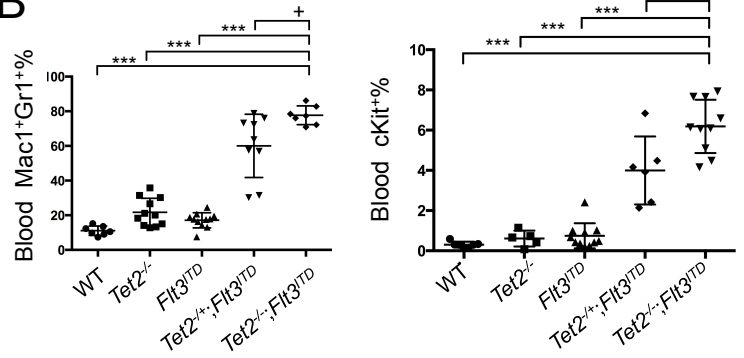

**C**

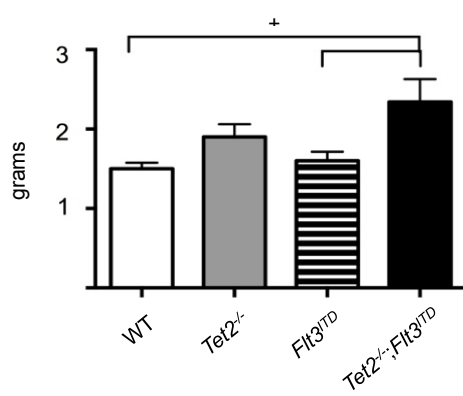

**D**

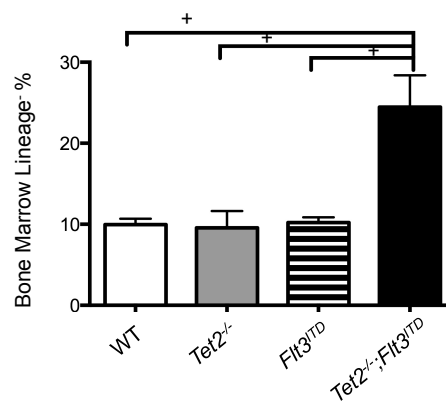

**E**

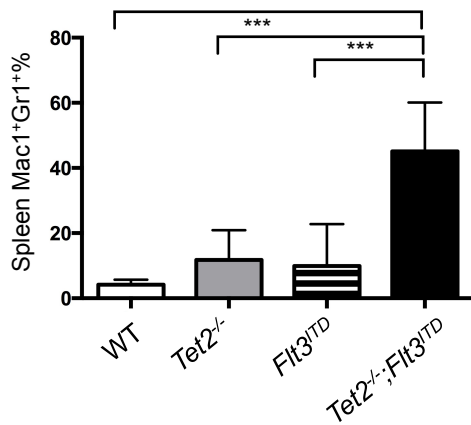

**F**

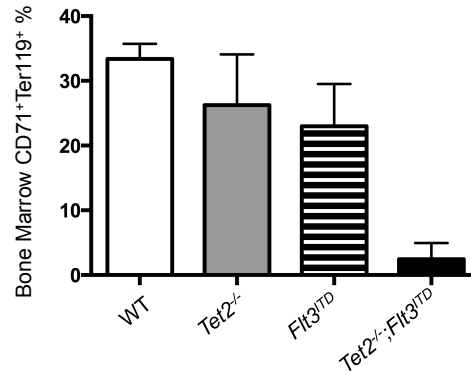

**G**

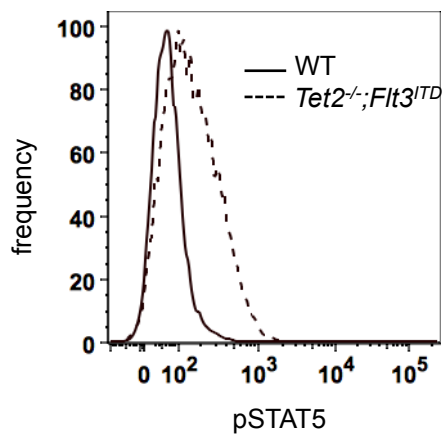

# H

| CHROM  | POS       | REF | ALT | GENE NAME            | SNPEFF_EFFECT         | SNPEFF_AA_CHANGE      | T Alt | T Ref | N Alt | N Ref |
|--------|-----------|-----|-----|----------------------|-----------------------|-----------------------|-------|-------|-------|-------|
| Tumor1 |           |     |     |                      |                       |                       |       |       |       |       |
| 5      | 129022952 | G   | A   | <i>Ran</i>           | DOWNSTREAM            | NA                    | 3     | 26    | 0     | 22    |
| 14     | 21847546  | T   | G   | <i>Vdac2</i>         | DOWNSTREAM            | NA                    | 7     | 17    | 1     | 10    |
| 15     | 77392947  | G   | A   | <i>Apol7a</i>        | DOWNSTREAM            | NA                    | 6     | 31    | 2     | 16    |
| 6      | 86750782  | C   | G   | <i>Anxa4</i>         | EXON                  | NA                    | 5     | 9     | 0     | 12    |
| 1      | 136424687 | A   | G   | <i>Ddx59</i>         | INTRON                | NA                    | 3     | 18    | 0     | 22    |
| 9      | 20942478  | G   | A   | <i>Dnmt1</i>         | INTRON                | NA                    | 4     | 33    | 1     | 25    |
| 11     | 80592961  | A   | C   | <i>Myo1d</i>         | INTRON                | NA                    | 5     | 37    | 2     | 33    |
| 11     | 105810422 | T   | A   | <i>Tanc2</i>         | INTRON                | NA                    | 8     | 97    | 1     | 46    |
| 14     | 55829674  | A   | C   | <i>Nfatc4</i>        | INTRON                | NA                    | 6     | 30    | 0     | 10    |
| 14     | 68633351  | A   | T   | <i>Adam28</i>        | INTRON                | NA                    | 4     | 15    | 1     | 14    |
| 12     | 54203685  | T   | C   | <i>Egln3</i>         | UTR_5_PRIME           | NA                    | 7     | 13    | 0     | 8     |
| 10     | 77826817  | G   | A   | <i>Gm7137</i>        | INTRON                | NA                    | 4     | 74    | 0     | 48    |
| 10     | 99113352  | C   | T   | <i>Galnt4</i>        | DOWNSTREAM            | NA                    | 3     | 7     | 0     | 8     |
| 19     | 47668192  | A   | T   | <i>Col17a1</i>       | DOWNSTREAM            | NA                    | 4     | 11    | 0     | 11    |
| 2      | 43589320  | T   | A   | <i>Kynu</i>          | INTRON                | NA                    | 3     | 27    | 0     | 22    |
| 2      | 166048355 | T   | G   | <i>Ncoa3</i>         | INTRON                | NA                    | 4     | 7     | 0     | 10    |
| 7      | 97035338  | T   | C   | <i>Nars2</i>         | INTRON                | NA                    | 4     | 54    | 0     | 46    |
| 2      | 70256394  | T   | A   | <i>Myo3b</i>         | INTRON                | NA                    | 8     | 26    | 0     | 20    |
| Tumor2 |           |     |     |                      |                       |                       |       |       |       |       |
| 5      | 124599570 | G   | T   | <i>Gtf2h3</i>        | DOWNSTREAM            | NA                    | 16    | 26    | 1     | 37    |
| 16     | 90726975  | A   | C   | <i>Mis18a</i>        | EXON                  | NA                    | 6     | 7     | 0     | 11    |
| 1      | 8678965   | C   | A   | <i>Sntg1</i>         | INTRON                | NA                    | 5     | 125   | 0     | 54    |
| 1      | 78393277  | C   | G   | <i>Sgpp2</i>         | INTRON                | NA                    | 3     | 18    | 1     | 22    |
| 2      | 70256396  | A   | T   | <i>Myo3b</i>         | INTRON                | NA                    | 5     | 25    | 1     | 19    |
| 2      | 130240363 | A   | T   | <i>Tmc2</i>          | INTRON                | NA                    | 3     | 15    | 0     | 11    |
| 4      | 115532819 | A   | C   | <i>Cyp4a10</i>       | INTRON                | NA                    | 8     | 39    | 0     | 15    |
| 4      | 147682444 | G   | C   | <i>Zfp534</i>        | INTRON                | NA                    | 14    | 116   | 1     | 112   |
| 5      | 3972660   | T   | G   | <i>Akap9</i>         | INTRON                | NA                    | 8     | 67    | 0     | 31    |
| 5      | 23839932  | A   | C   | <i>Tom7</i>          | INTRON                | NA                    | 11    | 72    | 0     | 27    |
| 5      | 45581367  | A   | G   | <i>Fam184b</i>       | INTRON                | NA                    | 7     | 34    | 0     | 25    |
| 5      | 53837766  | T   | G   | <i>Tbc1d19</i>       | INTRON                | NA                    | 8     | 38    | 0     | 20    |
| 5      | 107598397 | G   | T   | <i>Rpap2</i>         | INTRON                | NA                    | 21    | 139   | 2     | 97    |
| 6      | 41374845  | T   | G   | <i>Prss3</i>         | INTRON                | NA                    | 13    | 82    | 2     | 59    |
| 6      | 73037798  | G   | C   | <i>Dnahc6</i>        | INTRON                | NA                    | 4     | 13    | 0     | 12    |
| 7      | 49304707  | A   | G   | <i>Nav2</i>          | INTRON                | NA                    | 3     | 15    | 0     | 21    |
| 7      | 91711646  | C   | T   | <i>Dlg2</i>          | INTRON                | NA                    | 8     | 32    | 0     | 34    |
| 8      | 33257076  | A   | G   | <i>Wrrn</i>          | INTRON                | NA                    | 5     | 40    | 1     | 66    |
| 8      | 80989946  | T   | G   | <i>Usp38</i>         | INTRON                | NA                    | 9     | 76    | 0     | 34    |
| 8      | 87582492  | C   | G   | <i>4933402J07Rik</i> | INTRON                | NA                    | 6     | 30    | 0     | 30    |
| 9      | 99551463  | T   | G   | <i>Armc8</i>         | INTRON                | NA                    | 9     | 63    | 0     | 40    |
| 10     | 94864588  | T   | G   | <i>Ptxnc1</i>        | INTRON                | NA                    | 14    | 135   | 3     | 61    |
| 15     | 83703673  | G   | T   | <i>Scube1</i>        | INTRON                | NA                    | 3     | 41    | 0     | 14    |
| 16     | 15714290  | A   | C   | <i>Prkdc</i>         | INTRON                | NA                    | 22    | 41    | 0     | 30    |
| 17     | 57004894  | C   | T   | <i>Gtf2f1</i>        | INTRON                | NA                    | 3     | 34    | 0     | 26    |
| 18     | 43575650  | G   | T   | <i>Jakmip2</i>       | INTRON                | NA                    | 8     | 81    | 0     | 33    |
| 19     | 16742294  | T   | G   | <i>Vps13a</i>        | INTRON                | NA                    | 7     | 34    | 0     | 10    |
| X      | 26039427  | T   | G   | <i>Gm5168</i>        | INTRON                | NA                    | 15    | 280   | 0     | 125   |
| X      | 73262316  | T   | G   | <i>Xlr3c</i>         | INTRON                | NA                    | 9     | 82    | 1     | 43    |
| 15     | 66016468  | G   | T   | <i>Kcnq3</i>         | NON_SYNONYMOUS_CODING | p.Gln416Lys/c.1246G>T | 4     | 8     | 2     | 16    |
| X      | 164944124 | A   | G   | <i>Mospd2</i>        | INTRON                | NA                    | 13    | 40    | 0     | 26    |
| 10     | 100568245 | A   | T   | <i>4930430F08Rik</i> | DOWNSTREAM            | NA                    | 4     | 15    | 0     | 8     |
| 17     | 57419516  | T   | C   | <i>Emr1</i>          | INTRON                | NA                    | 4     | 16    | 0     | 17    |
| Tumor3 |           |     |     |                      |                       |                       |       |       |       |       |
| 4      | 133416542 | A   | G   | <i>Slc9a1</i>        | DOWNSTREAM            | NA                    | 4     | 63    | 2     | 41    |
| 15     | 77424554  | C   | T   | <i>Apol7b</i>        | DOWNSTREAM            | NA                    | 7     | 112   | 1     | 70    |
| 17     | 57306947  | A   | T   | <i>Vav1</i>          | DOWNSTREAM            | NA                    | 6     | 34    | 1     | 19    |
| 1      | 19212542  | C   | G   | <i>Tfap2b</i>        | INTRON                | NA                    | 3     | 22    | 1     | 36    |
| 1      | 93063023  | C   | T   | <i>Kif1a</i>         | INTRON                | NA                    | 3     | 33    | 0     | 18    |
| 2      | 92427096  | A   | T   | <i>Cry2</i>          | INTRON                | NA                    | 7     | 13    | 0     | 8     |
| 2      | 93675178  | T   | A   | <i>Alx4</i>          | INTRON                | NA                    | 4     | 20    | 1     | 20    |
| 9      | 21124799  | A   | C   | <i>Tyk2</i>          | INTRON                | NA                    | 4     | 25    | 0     | 11    |
| 17     | 80352851  | A   | T   | <i>Arhgef33</i>      | INTRON                | NA                    | 3     | 16    | 0     | 11    |
| 15     | 77424576  | A   | G   | <i>Apol7b</i>        | DOWNSTREAM            | NA                    | 9     | 152   | 1     | 104   |
| 5      | 144794497 | T   | C   | <i>Trrap</i>         | INTRON                | NA                    | 8     | 40    | 0     | 21    |
| X      | 89755060  | G   | A   | <i>4932429P05Rik</i> | UTR_3_PRIME           | NA                    | 12    | 111   | 1     | 56    |
| 4      | 136052816 | G   | A   | <i>Rpl11</i>         | EXON                  | NA                    | 4     | 62    | 0     | 30    |
| 19     | 11307561  | A   | T   | <i>NA</i>            | INTERGENIC            | NA                    | 4     | 25    | 0     | 22    |
| 3      | 152322561 | C   | T   | <i>Fam73a</i>        | INTRON                | NA                    | 10    | 21    | 0     | 17    |
| 5      | 137473436 | T   | A   | <i>Zan</i>           | INTRON                | NA                    | 3     | 13    | 0     | 12    |
| 17     | 57279487  | G   | A   | <i>Vav1</i>          | INTRON                | NA                    | 4     | 40    | 0     | 23    |
| 17     | 57419516  | T   | C   | <i>Emr1</i>          | INTRON                | NA                    | 4     | 21    | 0     | 12    |
| 18     | 33921753  | A   | T   | <i>Epb4.14a</i>      | INTRON                | NA                    | 9     | 29    | 0     | 20    |
| 10     | 100341470 | C   | A   | <i>Gm4302</i>        | NON_SYNONYMOUS_CODING | p.Ser205Arg/c.615C>A  | 4     | 24    | 0     | 21    |
| 8      | 104524304 | C   | G   | <i>Nae1</i>          | DOWNSTREAM            | NA                    | 5     | 20    | 0     | 21    |
| 7      | 3911858   | T   | A   | <i>Lilra6</i>        | EXON                  | NA                    | 5     | 63    | 0     | 31    |
| 7      | 97035348  | T   | C   | <i>Nars2</i>         | INTRON                | NA                    | 6     | 42    | 0     | 24    |
| 3      | 109934836 | G   | A   | <i>Ntng1</i>         | NON_SYNONYMOUS_CODING | p.Thr207Met/c.620G>A  | 4     | 72    | 0     | 43    |

Figure S1. Related to Figure 1. Characterization of *VTet2<sup>-/-</sup> Flt3<sup>ITD</sup>* mice

(A-F) Platelet count (A), Mac1<sup>+</sup>Gr1<sup>+</sup> and cKit<sup>+</sup> peripheral blood frequencies (B), liver weight (C), lineage<sup>-</sup> bone marrow frequencies (D), spleen Mac1<sup>+</sup>Gr1<sup>+</sup> frequencies (E), and CD71<sup>+</sup>Ter119<sup>+</sup> bone marrow frequencies (F) of WT, *Tet2<sup>-/-</sup>*, *Flt3<sup>ITD</sup>*, *Tet2<sup>-/-</sup>;Flt3<sup>ITD</sup>* mice (n=5 to 10 per group). (G) Phospho-STAT5 phosphoflow in WT and *Tet2<sup>-/-</sup>;Flt3<sup>ITD</sup>* mouse bone marrow (representative plot from n=3). (H) Table of somatic nucleotide polymorphisms (SNPs) from 3 *Tet2<sup>-/-</sup>;Flt3<sup>ITD</sup>* leukemias determined through exome sequencing and MuTect analysis. N/A- does not affect amino acid change. CHROM, chromosome; POS, position; REF, reference nucleotide; ALT, alternate nucleotide; SNPEFF\_EFFECT, location of SNP in gene structure; SNPEFF\_AA\_CHANGE, effect of SNP on amino acid change; T, leukemia tumor; N, normal; Alt, number of alternate nucleotide reads; Ref, number of reference nucleotide reads. + p<=.05, \* p<=.01, \*\* p<=.001, \*\*\* p<=.0001. p values using unpaired Student's t-test. Graphs mean±SEM.

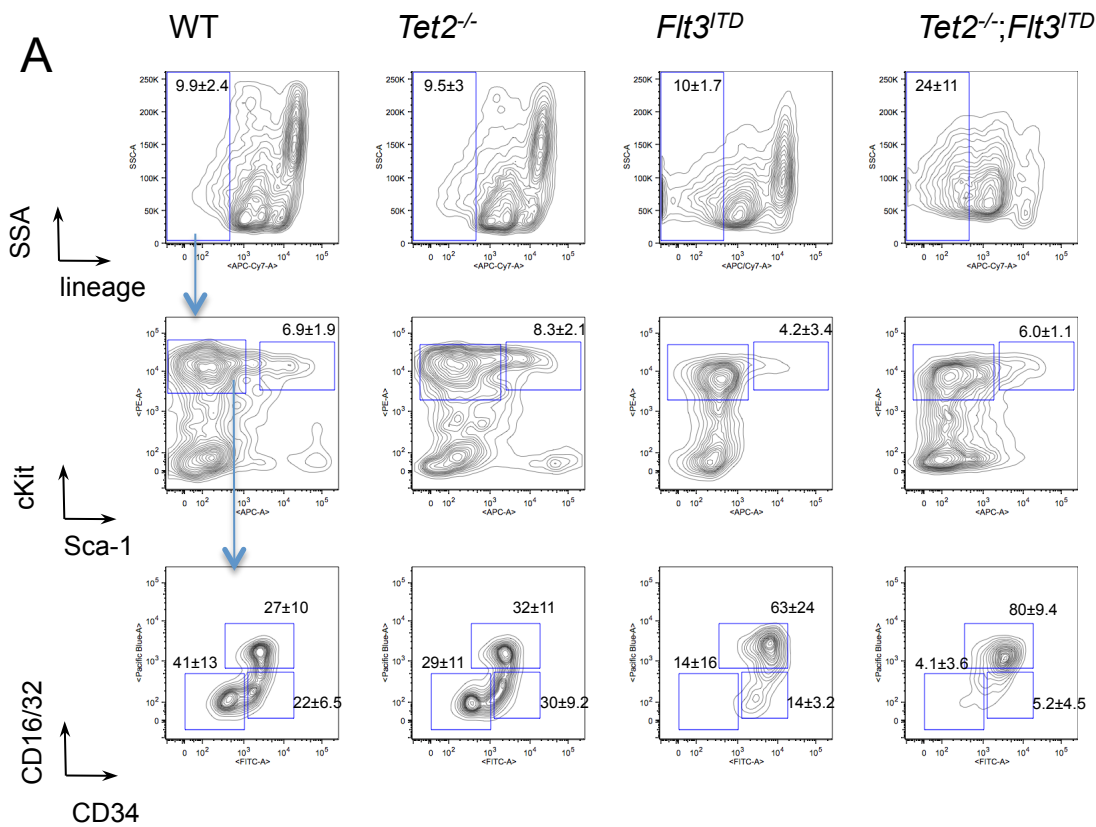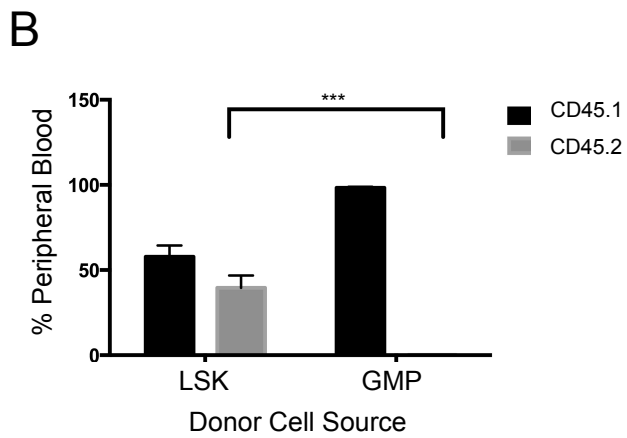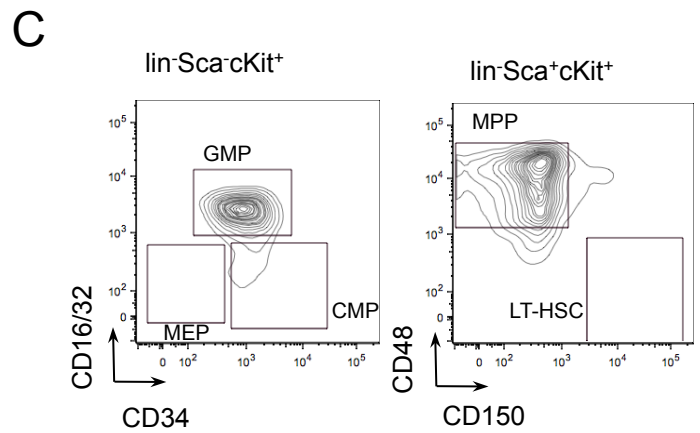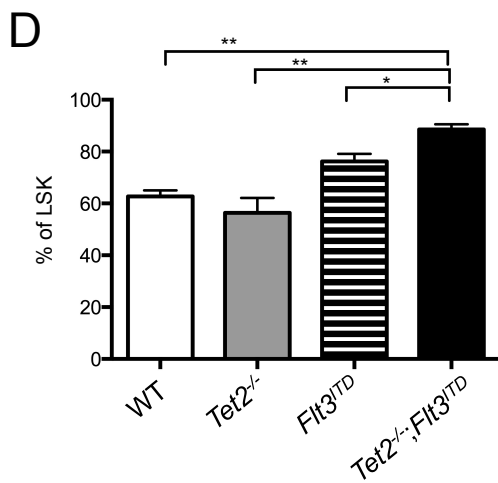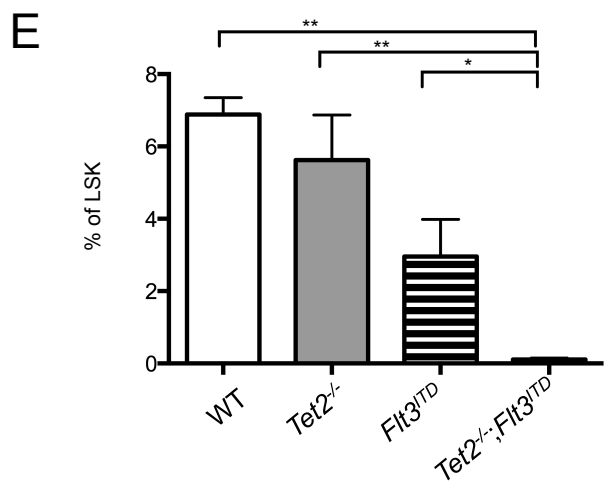

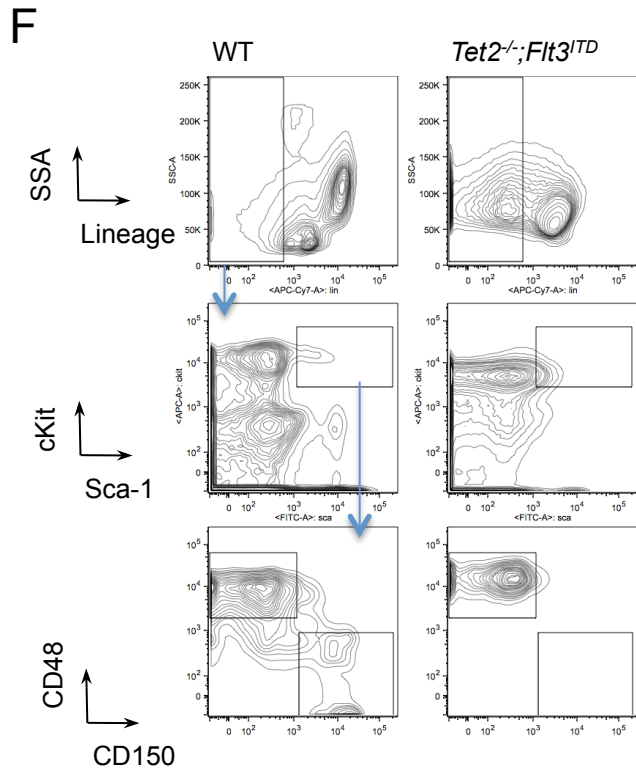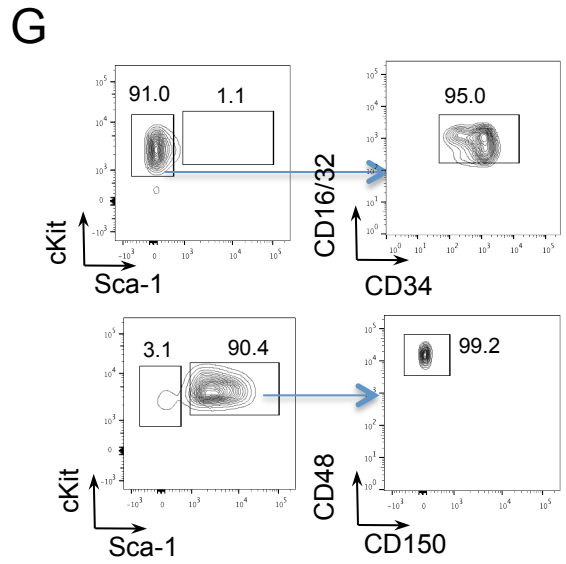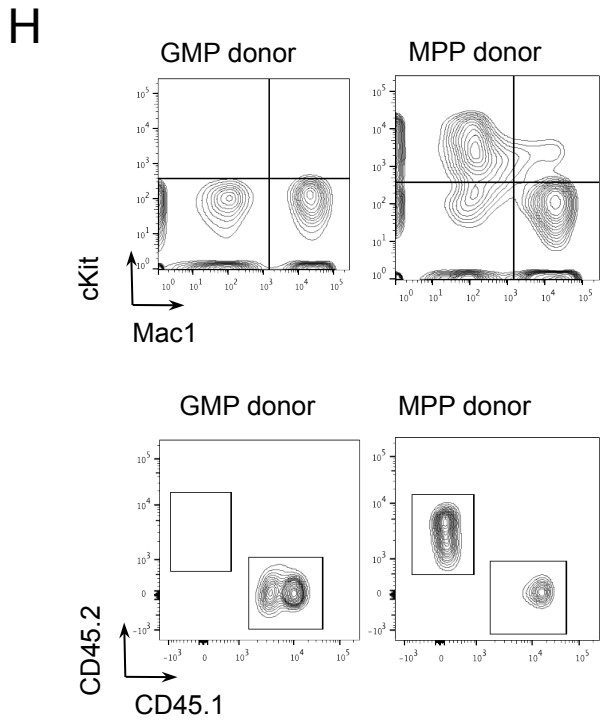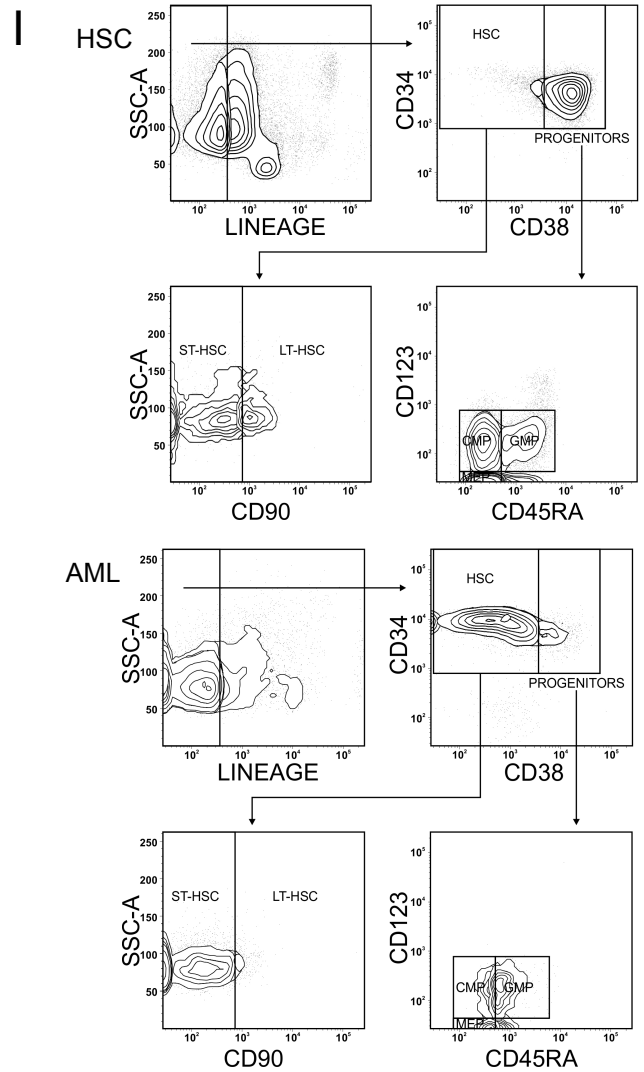

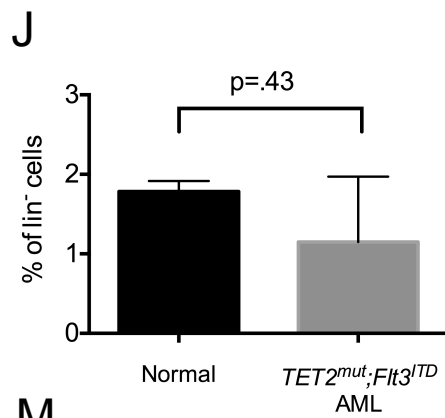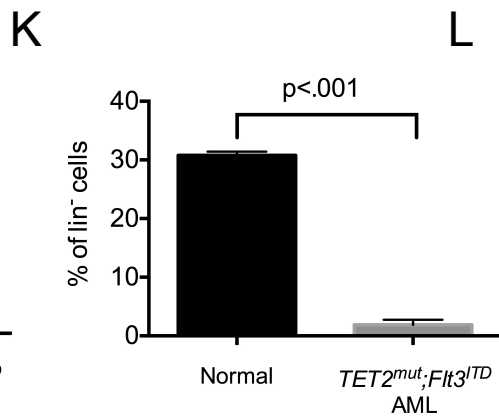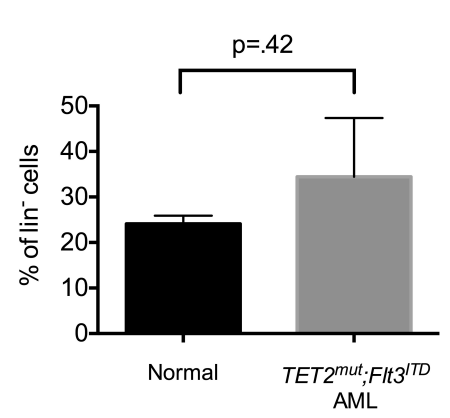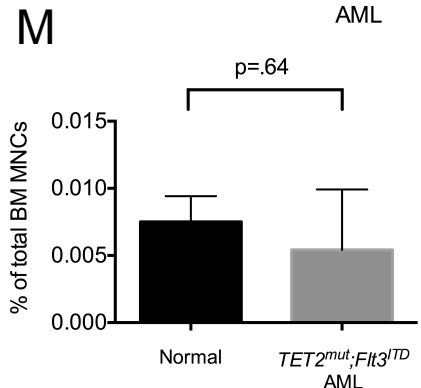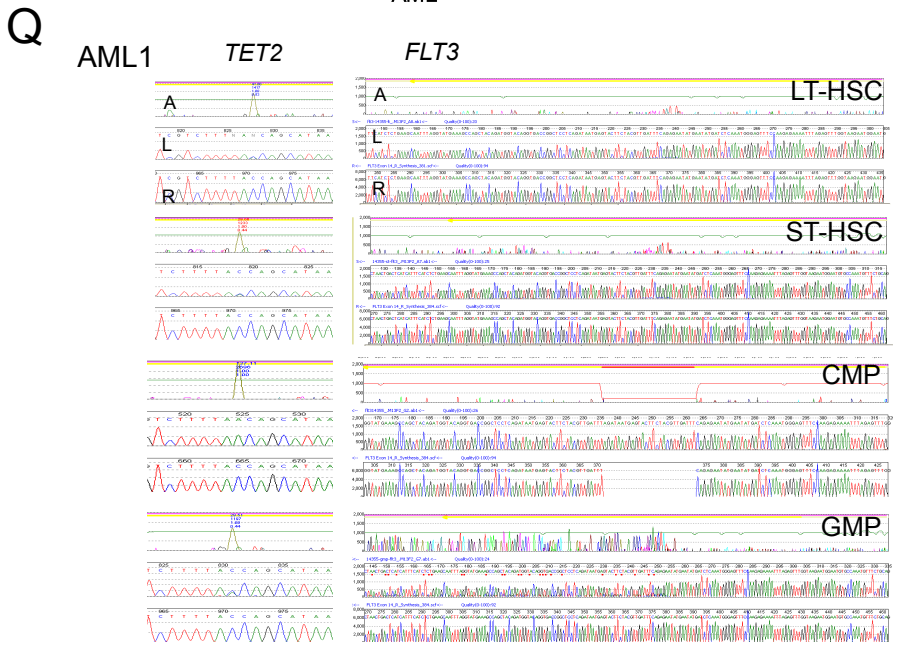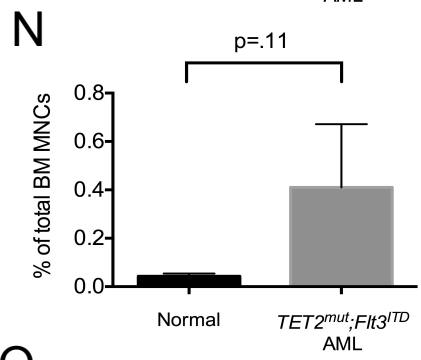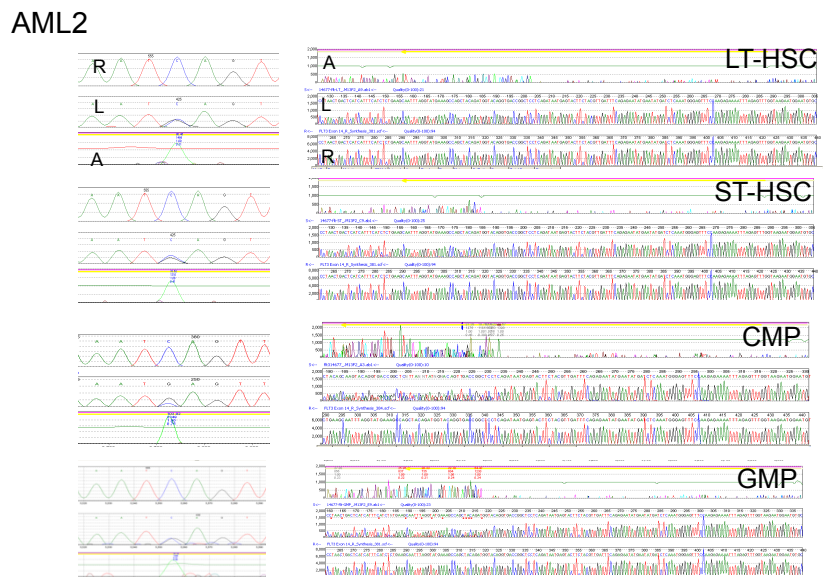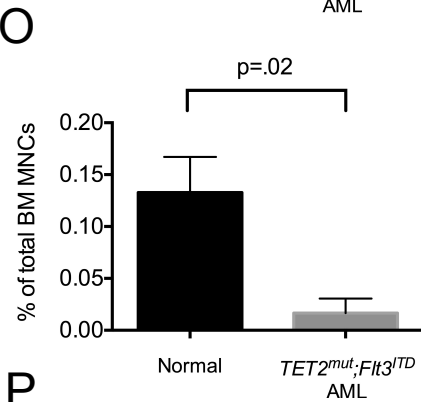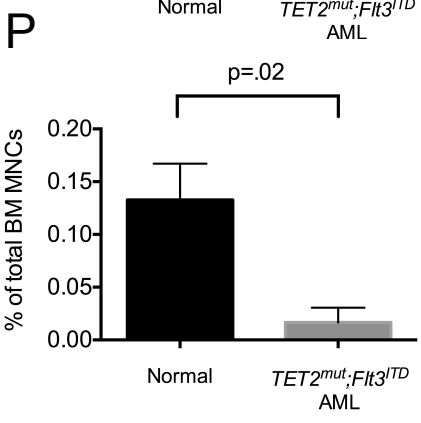

Figure S2. Related to Figure 2. LSK cells act as leukemic initiating cell in *VTet2<sup>-/-</sup>Flt3<sup>ITD</sup>* leukemia

(A) Analysis of myeloid progenitor and LSK frequencies. gate mean  $\pm$  SEM. (B) Peripheral blood CD45.1 (normal host marker) and CD45.2 (donor leukemia marker) frequencies in LSK or GMP *Tet2<sup>-/-</sup>;Flt3<sup>ITD</sup>* transplanted mice at 2 weeks. (C) Progenitor and SLAM LSK analysis in LSK *Tet2<sup>-/-</sup>;Flt3<sup>ITD</sup>* transplanted mice. (D-F) Relative frequency of MPP (D) and LT-HSC (E) in WT, *Tet2<sup>-/-</sup>*, *Flt3<sup>ITD</sup>*, and *Tet2<sup>-/-</sup>;Flt3<sup>ITD</sup>* LSK cells, and gating strategy (F) (n=4 to 6 per group). (G) Post sort purity analysis of sorted GMP and MPP cells from *VTet2<sup>-/-</sup>Flt3<sup>ITD</sup>* bone marrow. % of gate. (H) Peripheral blood Mac1, cKit, CD45.1, CD45.2 analysis from GMP and MPP *VTet2<sup>-/-</sup>Flt3<sup>ITD</sup>* donor transplants. (I) Sorting scheme of normal subjects (HSC) and human AMLs with *TET2* and *FLT3<sup>ITD</sup>* mutations. (J-P) Frequency of LT-HSC (J), CMP (K), and GMP (L) as % of lin<sup>-</sup> bone marrow and LT-HSC (M), ST-HSC/MPP (N), CMP (O), and GMP (P) as % of total bone marrow mononuclear cells (BM MNCs) in normal subjects and *TET2;FLT3<sup>ITD</sup>* mutant AMLs (n=9). LT-HSC, long term hematopoietic stem cell; ST-HSC, short term hematopoietic stem cell; MPP, multipotent progenitor; CMP, common myeloid progenitor; GMP, granulocyte-macrophage progenitor. (Q) Examples of *TET2* and *FLT3<sup>ITD</sup>* mutations found in LT-HSCs, ST-HSCs, CMPs, and GMPs. Order of sequence traces (analysis, leukemia, or reference) are as indicated for LT-HSC sample. A, analysis of sequencing with peaks indicating variation from reference; L, leukemia sequencing; R, corresponding reference sequence. \* p<=.01 , \*\* p<=.001, \*\*\* p<=.0001. p values using unpaired Student's t-test. Graphs mean $\pm$ SEM.

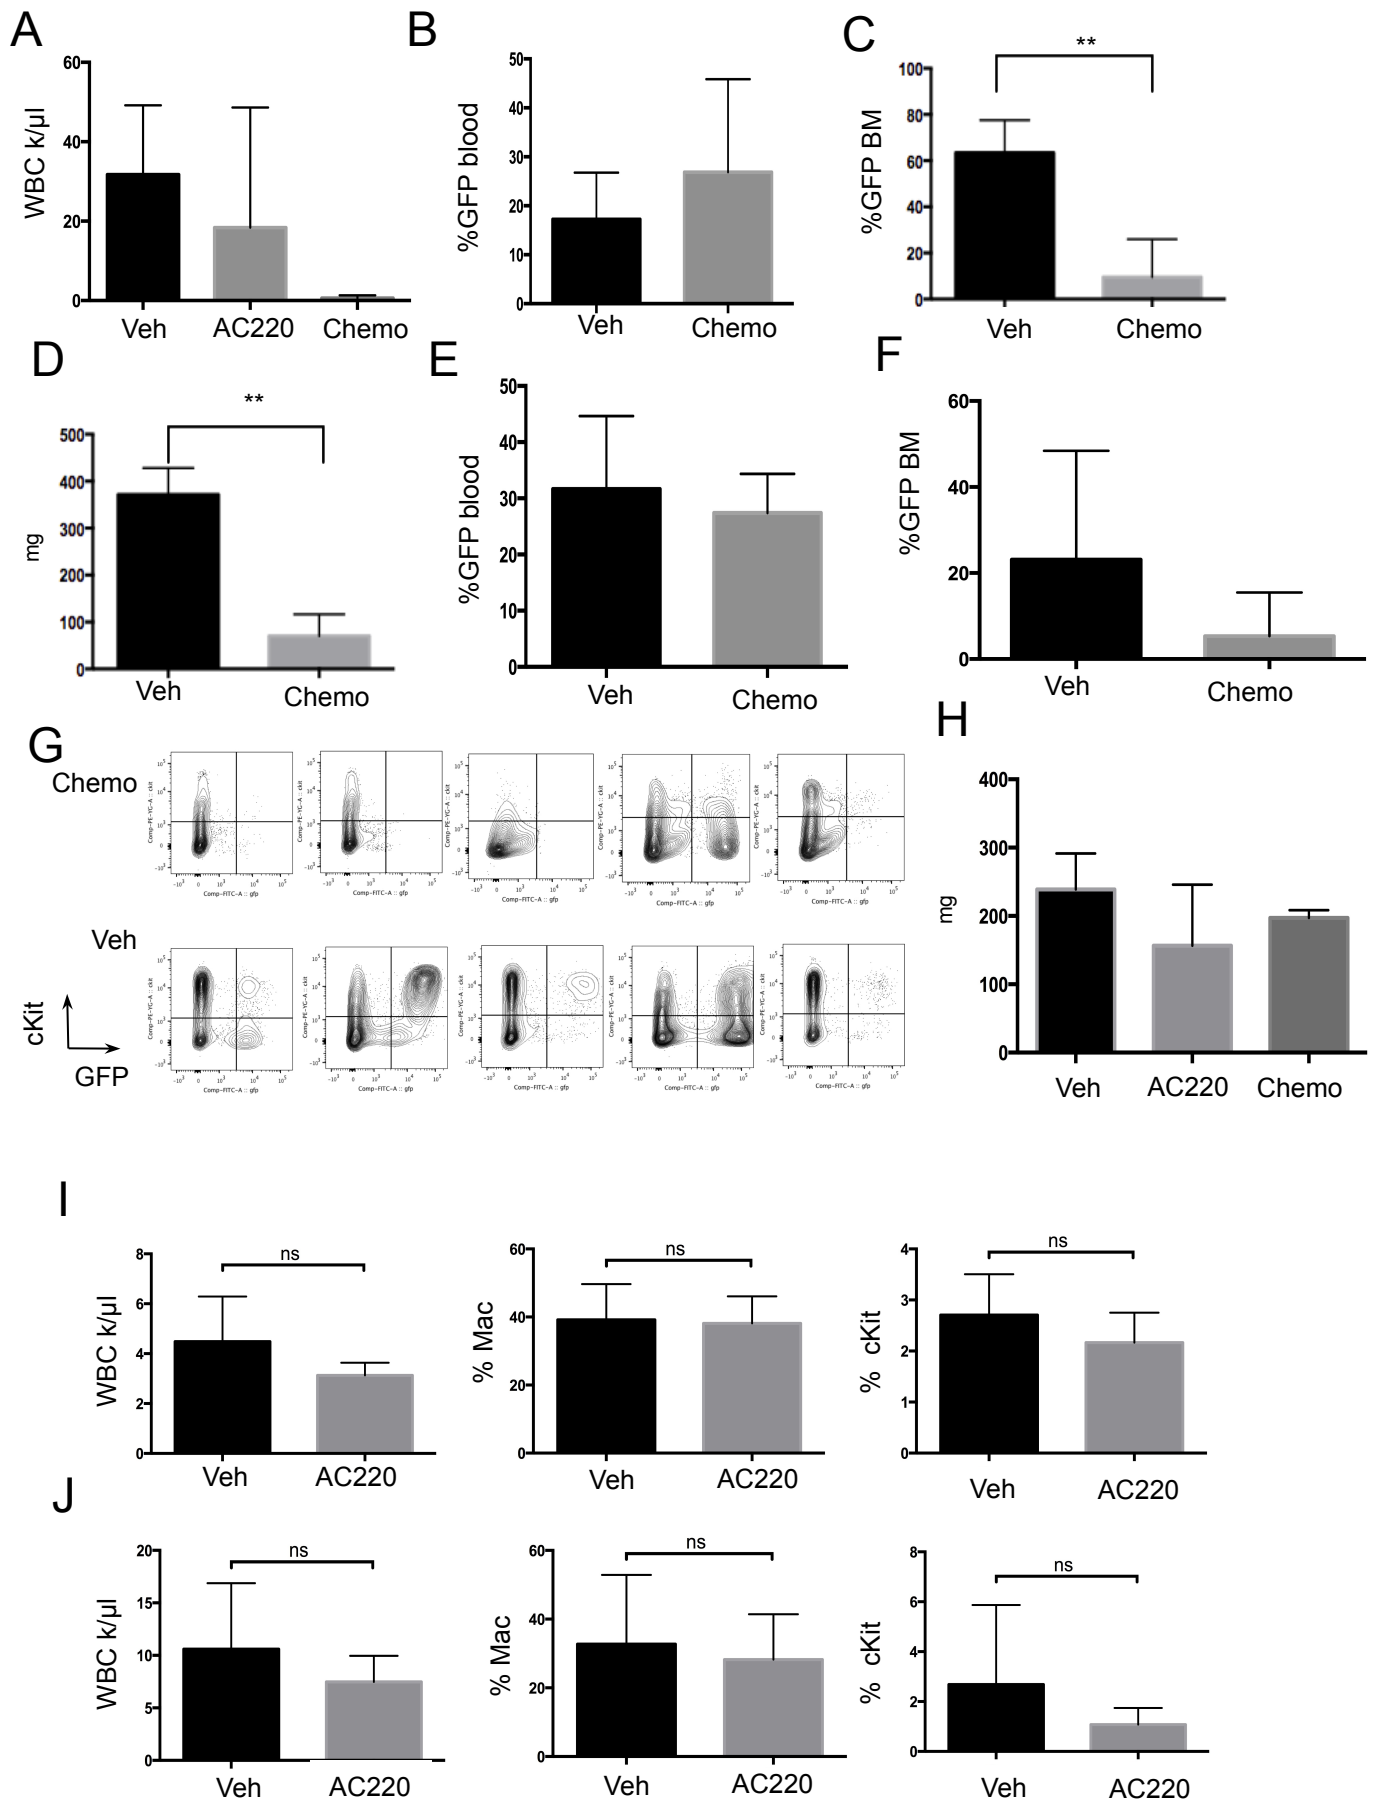



Figure S3. Related to Figure 3. *VTet2<sup>-/-</sup>;Flt3<sup>ITD</sup>* therapy response

(A) WBC count at 2 weeks of *Tet2<sup>-/-</sup>;Flt3<sup>ITD</sup>* transplanted mice treated with vehicle, AC220, or chemotherapy. (B) Pre-treatment peripheral blood GFP% of *AML1-ETO-9a* leukemia (n=5 per group). (C,D) Post-treatment bone marrow %GFP (C) and spleen weight (D) from vehicle or chemotherapy treated *AML1-ETO-9a* transplanted leukemia. (E) Pre-treatment peripheral blood GFP% of *AML1-ETO NRAS<sup>G12D</sup>* leukemia (n=5 per group). (F,G) Post-treatment bone marrow %GFP (F) from vehicle or chemotherapy treated *AML1-ETO NRAS<sup>G12D</sup>* transplanted leukemia and flow plot of individual mice for GFP<sup>+</sup>cKit<sup>+</sup> leukemia cells (G). (H) Spleen weight of mice transplanted with *VTet2<sup>-/-</sup>;Flt3<sup>ITD</sup>* leukemia following treatment for 4 weeks (n=5 per group). (I,J) Peripheral blood analysis of mice transplanted with cells from Vehicle or AC220 treated mice with *Tet2<sup>-/-</sup>;Flt3<sup>ITD</sup>* leukemia at 28 days (I) and 62 days (J) for WBC, %Mac, and %cKit (n=7 per recipient group). ns, not statistically significant. p values using unpaired Student's t-test. Graphs mean±SEM.

**A**

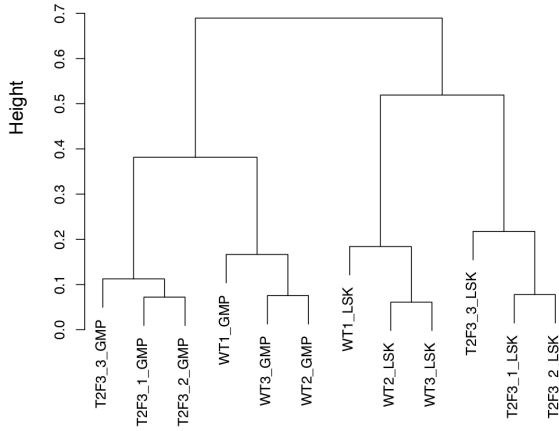

**B**

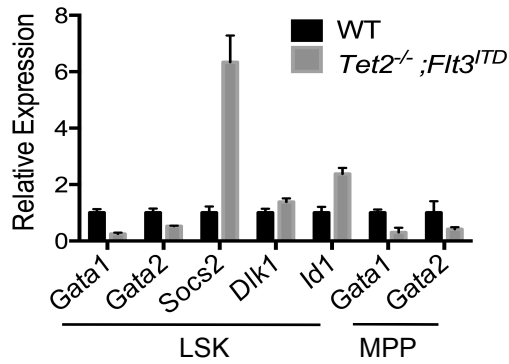

**C**

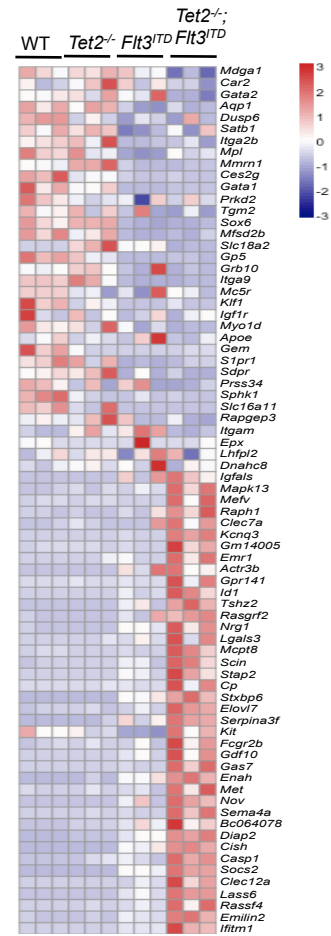

**D**

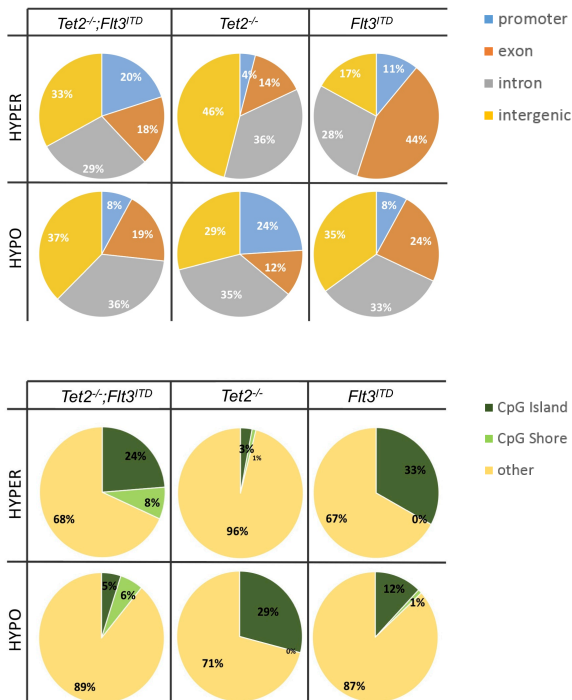

**E**

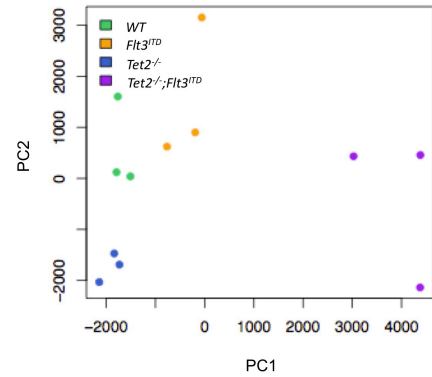

Figure S4. Related to Figure 4. Expression and methylation analysis of *VTet2<sup>-/-</sup> Flt3<sup>ITD</sup>*

LSK cells

(A) Dendrogram clustering of RNA-seq expression from WT and *Tet2<sup>-/-</sup>;Flt3<sup>ITD</sup>* (T2F3) LSK and GMP cells. (B) qRT PCR validation of select *Tet2<sup>-/-</sup>;Flt3<sup>ITD</sup>* differentially expressed genes from LSK and MPP cells. Mean $\pm$ SEM. (C) Heat map of differentially expressed genes in *Tet2<sup>-/-</sup>;Flt3<sup>ITD</sup>* LSKs (in Figure 4B) compared to WT, *Flt3<sup>ITD</sup>*, and *Tet2<sup>-/-</sup>* LSK cells. (D) DMR genomic localization and characterization. (E) Principal component analysis of eRRBS methylation profiles compared to wild-type.

Table S1, related to Figure 4. Provided as an Excel File.

Table S2, related to Figure 4. Provided as an Excel File.

Table S3, related to Figure 4. Provided as an Excel File.

**A**

Tic marks separate per chromosome

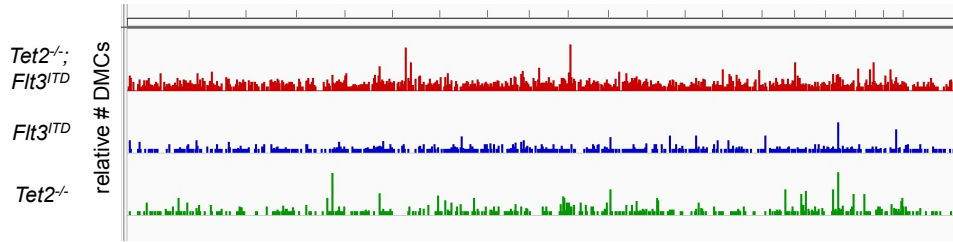**B**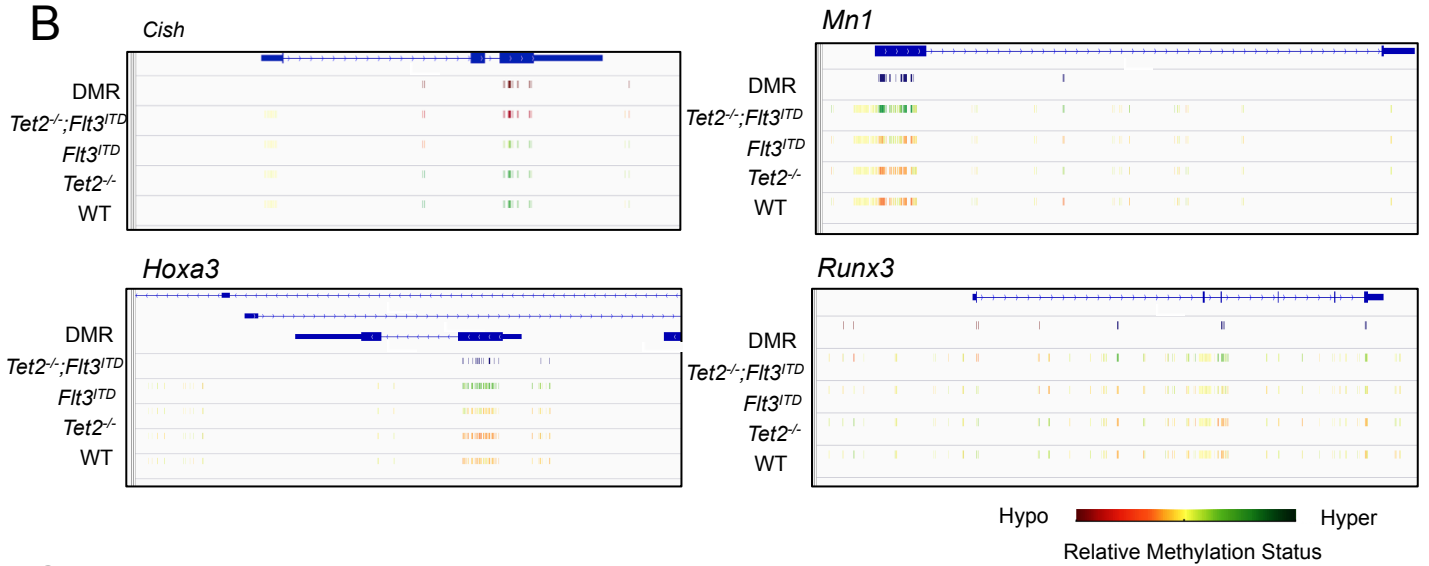**C**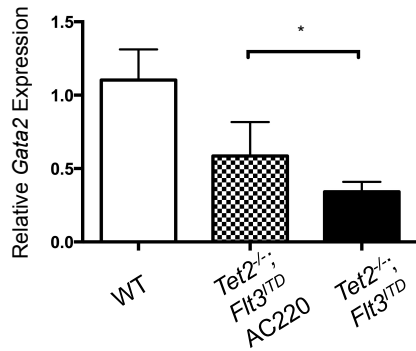**D**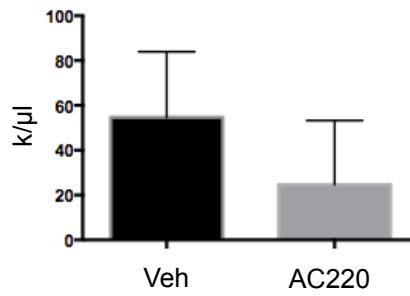**E**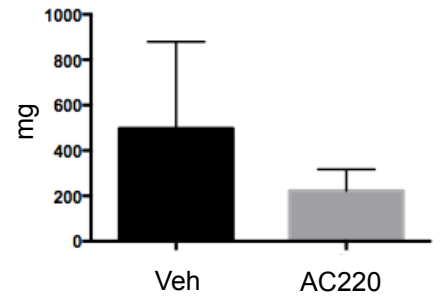**F**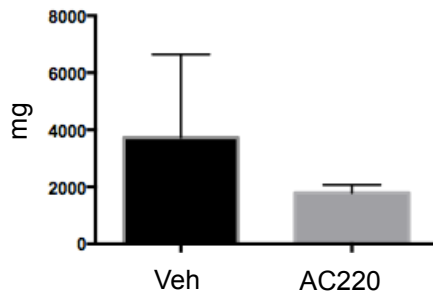**G**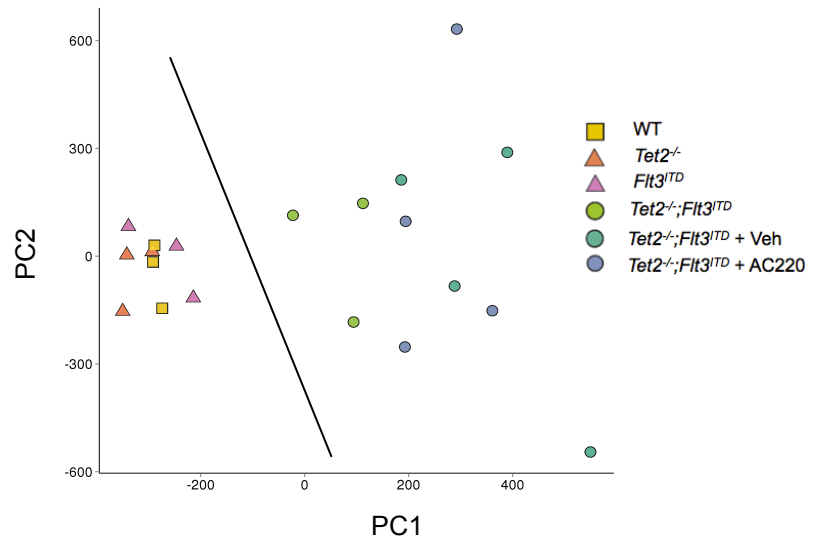

**H**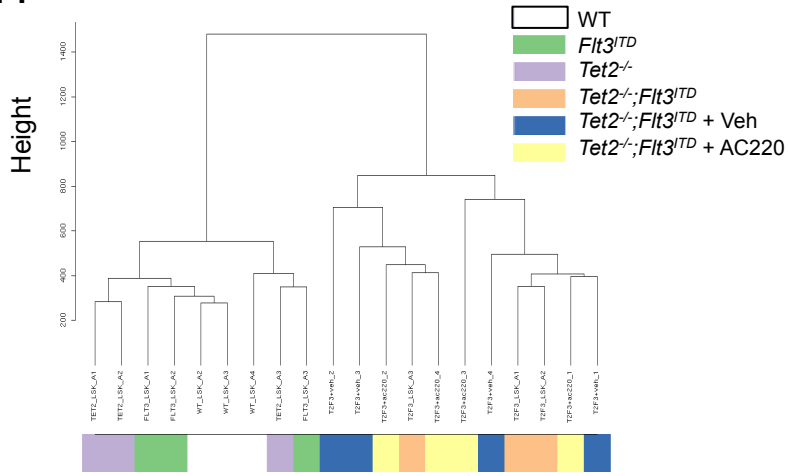**I**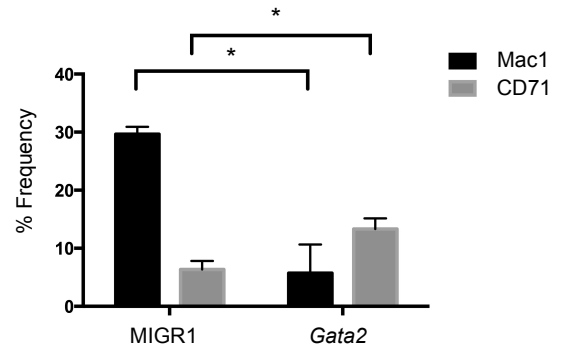**J**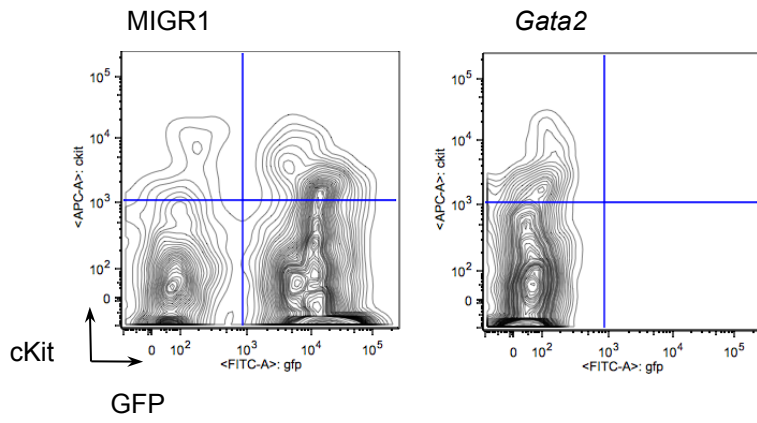

Figure S5. Related to Figure 5. Cooperativity of *Tet2*<sup>-/-</sup> and *Flt3*<sup>ITD</sup> on methylation and gene expression

(A) Whole genome differentially methylated cytosine (DMC) profile in *Tet2*<sup>-/-</sup>;*Flt3*<sup>ITD</sup>, *Flt3*<sup>ITD</sup>, and *Tet2*<sup>-/-</sup> LSK cells vs WT. (B) Example gene loci with differential methylation in *Tet2*<sup>-/-</sup>;*Flt3*<sup>ITD</sup> LSK cells compared to *Flt3*<sup>ITD</sup>, *Tet2*<sup>-/-</sup>, and WT LSK. DMR, differentially methylated region. (C) *Gata2* expression with qRT-PCR after treatment with AC220 in LSK bone marrow cells. (D-F) Primary *VTet2*<sup>-/-</sup> *Flt3*<sup>ITD</sup> mice response to vehicle or AC220 treatment for WBC (D), spleen weight (E), and liver weight (F). (G,H) Principle component analysis (G) and clustering (H) of eRRBS methylation profiles from WT, *Tet2*<sup>-/-</sup>, *Flt3*<sup>ITD</sup>, *Tet2*<sup>-/-</sup>;*Flt3*<sup>ITD</sup>, *Tet2*<sup>-/-</sup>;*Flt3*<sup>ITD</sup> vehicle treated, and *Tet2*<sup>-/-</sup>;*Flt3*<sup>ITD</sup> AC220 treated LSK cells. Line in (G) separating clustered groups (WT, *Tet2*<sup>-/-</sup>, and *Flt3*<sup>ITD</sup> from *Tet2*<sup>-/-</sup>;*Flt3*<sup>ITD</sup> untreated, vehicle treated, and AC220 treated). (I) Quantitation of CD71 and Mac1 expression in CFU assay cells from *Tet2*<sup>-/-</sup>;*Flt3*<sup>ITD</sup> bone marrow cells expressing MIGR1 control or *Gata2* (gated on GFP+) (n=3 per group). (J) Bone marrow GFP and cKit expression flow plot from mice transplanted with *VTet2*<sup>-/-</sup>;*Flt3*<sup>ITD</sup> bone marrow cells expressing MIGR1 control or *Gata2*. + p<=.05, \* p<=.01. p values using unpaired Student's t-test. Graphs mean±SEM.

Table S4, Related to Figure 5. Genes hypermethylated and decreased expression in *Tet2<sup>-/-</sup>;Flt3<sup>ITD</sup>* LSK cells

List of genes that have at least 3 differentially hypermethylated cytosines within the promoter or gene body and downregulated in expression by RNA-seq. Hyper DMC #, number of hypermethylated cytosines; T2F3, *Tet2<sup>-/-</sup>;Flt3<sup>ITD</sup>*; log2FC, log 2 fold change.

| Gene Symbol    | Hyper DMC # | Expression |
|----------------|-------------|------------|
|                | T2F3 vs WT  | log2FC     |
| <i>MN1</i>     | 113         | -2.24      |
| <i>LTBP3</i>   | 57          | -1.68      |
| <i>GATA2</i>   | 51          | -2.99      |
| <i>ZFPM1</i>   | 39          | -2.85      |
| <i>HOXA3</i>   | 37          | -2.19      |
| <i>HLF</i>     | 30          | -2.74      |
| <i>RUNX3</i>   | 24          | -1.05      |
| <i>RAPGEF3</i> | 24          | -2.88      |
| <i>TRIM47</i>  | 21          | -3.54      |
| <i>FAM110A</i> | 18          | -1.26      |
| <i>GSE1</i>    | 16          | -1.42      |
| <i>ADCY9</i>   | 10          | -1.64      |
| <i>CD247</i>   | 9           | -2.55      |
| <i>KIT</i>     | 8           | -1.73      |
| <i>DUSP4</i>   | 8           | -3.02      |
| <i>ARAP3</i>   | 8           | -1.56      |
| <i>SMARCA2</i> | 7           | -1.12      |
| <i>ZBTB16</i>  | 7           | -2.42      |
| <i>RAI1</i>    | 7           | -1.12      |
| <i>TGFBR2</i>  | 6           | -1.05      |
| <i>PRKG1</i>   | 6           | -5.25      |
| <i>ANK1</i>    | 6           | -3.45      |
| <i>GCNT2</i>   | 6           | -2.61      |
| <i>MICAL3</i>  | 6           | -1.91      |
| <i>DUSP6</i>   | 5           | -2.89      |
| <i>NFIC</i>    | 5           | -1.60      |
| <i>KCTD1</i>   | 5           | -1.05      |
| <i>MDGA1</i>   | 5           | -3.13      |
| <i>GDF3</i>    | 5           | -4.66      |
| <i>RPS4Y2</i>  | 5           | -3.48      |
| <i>PLCG1</i>   | 5           | -1.89      |
| <i>CUEDC1</i>  | 5           | -1.86      |
| <i>SIK1</i>    | 5           | -1.48      |
| <i>DEF8</i>    | 4           | -1.23      |
| <i>HNF4A</i>   | 4           | -1.99      |
| <i>EPOR</i>    | 4           | -5.76      |
| <i>OSGIN1</i>  | 4           | -5.15      |



|                      |   |       |
|----------------------|---|-------|
| <i>TNK2</i>          | 4 | -1.75 |
| <i>PANK1</i>         | 4 | -1.49 |
| <i>PLSCR3</i>        | 4 | -1.43 |
| <i>LHFPL2</i>        | 3 | -1.99 |
| <i>DNTT</i>          | 3 | -2.37 |
| <i>SCUBE3</i>        | 3 | -1.65 |
| <i>IKZF2</i>         | 3 | -1.33 |
| <i>NRIP1</i>         | 3 | -1.19 |
| <i>GATA1</i>         | 3 | -5.75 |
| <i>ITGA9</i>         | 3 | -5.11 |
| <i>PHF21B</i>        | 3 | -3.82 |
| <i>LTBP1</i>         | 3 | -2.98 |
| <i>4930515G01RIK</i> | 3 | -2.25 |
| <i>SDC4</i>          | 3 | -2.11 |
| <i>HOXB3</i>         | 3 | -2.11 |
| <i>RHD</i>           | 3 | -2.01 |
| <i>VWF</i>           | 3 | -1.92 |
| <i>TCF7</i>          | 3 | -1.78 |
| <i>RUSC2</i>         | 3 | -1.54 |
| <i>SAMD14</i>        | 3 | -1.54 |
| <i>EGFL7</i>         | 3 | -1.36 |

Table S5, related to Figure 5. Provided as an Excel File

Table S6, Related to Figure 5. Genes with promoter DMCs and differential RNA expression in *Tet2*<sup>-/-</sup> *Flt3*<sup>ITD</sup> LSK

List of genes with >=3 promoter Differentially Methylated Cytosines (DMCs) in *Tet2*<sup>-/-</sup>; *Flt3*<sup>ITD</sup> LSK from pairwise comparison to *Tet2*<sup>-/-</sup> or *Flt3*<sup>ITD</sup> LSK profiles and with differential gene expression. Each column represents number of DMCs in the comparison vs WT. log2FC, log2 fold change in gene expression. X indicates presence of DMCs in corresponding gene in *TET2* mutant (*TET2*<sup>mut</sup>) human AML.

| Gene Symbol   | <i>Tet2</i> <sup>-/-</sup> ; <i>Flt3</i> <sup>ITD</sup><br>vs WT | <i>Flt3</i> <sup>ITD</sup> vs<br>WT | <i>Tet2</i> <sup>-/-</sup> vs<br>WT | log2FC | <i>TET2</i> <sup>mut</sup> AML |
|---------------|------------------------------------------------------------------|-------------------------------------|-------------------------------------|--------|--------------------------------|
| GATA2         | 20                                                               | 1                                   | 0                                   | -2.99  | X                              |
| ARAP3         | 15                                                               | 1                                   | 0                                   | -1.56  | X                              |
| TMEM215       | 14                                                               | 0                                   | 0                                   | 2.35   | X                              |
| EGFL7         | 11                                                               | 0                                   | 0                                   | -1.36  | X                              |
| ANK1          | 10                                                               | 0                                   | 0                                   | -3.45  | X                              |
| GSE1          | 5                                                                | 0                                   | 0                                   | -1.42  | X                              |
| RPS4Y2        | 5                                                                | 0                                   | 0                                   | -3.48  |                                |
| FAM110A       | 4                                                                | 0                                   | 0                                   | -1.26  | X                              |
| PLSCR3        | 4                                                                | 0                                   | 0                                   | -1.43  | X                              |
| EPOR          | 4                                                                | 0                                   | 0                                   | -5.76  |                                |
| FLT1          | 3                                                                | 0                                   | 0                                   | 2.31   | X                              |
| SULF2         | 3                                                                | 0                                   | 0                                   | 2.00   | X                              |
| TMEM51        | 3                                                                | 0                                   | 0                                   | 3.61   | X                              |
| SCUBE3        | 3                                                                | 0                                   | 0                                   | -1.65  | X                              |
| TCF7          | 3                                                                | 0                                   | 0                                   | -1.78  | X                              |
| GATA1         | 3                                                                | 0                                   | 0                                   | -5.75  |                                |
| 6030419C18RIK | 3                                                                | 1                                   | 0                                   | 4.61   |                                |
| 4930515G01RIK | 3                                                                | 0                                   | 0                                   | -2.25  |                                |
| IGFALS        | -3                                                               | 0                                   | 0                                   | 7.15   | X                              |
| E330020D12RIK | -3                                                               | -1                                  | 0                                   | 2.95   |                                |
| ALDH1B1       | -4                                                               | 0                                   | 0                                   | 1.58   | X                              |
| SLC17A8       | -5                                                               | 0                                   | 0                                   | 4.55   | X                              |
| S1PR3         | -5                                                               | -2                                  | 0                                   | 1.38   | X                              |
| GIMAP4        | -5                                                               | -5                                  | 0                                   | 4.61   |                                |
| TIFAB         | -8                                                               | -2                                  | 0                                   | 1.29   |                                |
| IFI30         | -9                                                               | -3                                  | 0                                   | 3.18   | X                              |
| STAP2         | -12                                                              | 0                                   | 0                                   | 6.04   | X                              |

Table S7. Related to Figure 5. List of Genes and DMC number in the gene promoter region by eRRBS analysis of human ST-HSCs isolated from *TET2;FLT3<sup>ITD</sup>* mutant AML (n=2) compared to CD34<sup>+</sup> normal bone marrow cells (n=13). Genes list (n=53) derived from overlap with set of 83 murine genes which had  $\geq 5$  DMCs in the promoter region of *Tet2<sup>-/-</sup>;Flt3<sup>ITD</sup>* LSKs compared to WT LSKs and with a human ortholog.

| Gene Symbol     | Gene Name                                                                              | Promoter Methylation |      |       |
|-----------------|----------------------------------------------------------------------------------------|----------------------|------|-------|
|                 |                                                                                        | Hyper                | Hypo | Total |
| <i>EGFL7</i>    | EGF-like-domain, multiple 7                                                            | 63                   | 0    | 63    |
| <i>FGF8</i>     | fibroblast growth factor 8 (androgen-induced)                                          | 40                   | 0    | 40    |
| <i>TSSK3</i>    | testis-specific serine kinase 3                                                        | 39                   | 0    | 39    |
| <i>ZNF503</i>   | zinc finger protein 503                                                                | 34                   | 0    | 34    |
| <i>CDX1</i>     | caudal type homeobox 1                                                                 | 33                   | 0    | 33    |
| <i>GP1BB</i>    | glycoprotein Ib (platelet), beta polypeptide                                           | 31                   | 0    | 31    |
| <i>TMEM215</i>  | transmembrane protein 215                                                              | 31                   | 0    | 31    |
| <i>S1PR3</i>    | sphingosine-1-phosphate receptor 3                                                     | 29                   | 0    | 29    |
| <i>B3GNT9</i>   | UDP-GlcNAc:betaGal beta-1,3-N-acetylglucosaminyltransferase 9                          | 28                   | 0    | 28    |
| <i>HOXA5</i>    | homeobox A5                                                                            | 28                   | 0    | 28    |
| <i>OTX1</i>     | orthodenticle homeobox 1                                                               | 27                   | 0    | 27    |
| <i>GATA2</i>    | GATA binding protein 2                                                                 | 18                   | 0    | 18    |
| <i>TBX1</i>     | T-box 1                                                                                | 18                   | 0    | 18    |
| <i>ANK1</i>     | ankyrin 1, erythrocytic                                                                | 15                   | 2    | 17    |
| <i>CACNG6</i>   | calcium channel, voltage-dependent, gamma subunit 6                                    | 16                   | 1    | 17    |
| <i>HIF3A</i>    | hypoxia inducible factor 3, alpha subunit                                              | 17                   | 0    | 17    |
| <i>CYB5D1</i>   | cytochrome b5 domain containing 1                                                      | 16                   | 0    | 16    |
| <i>MIR196A1</i> | microRNA 196a-1                                                                        | 16                   | 0    | 16    |
| <i>SF3B2</i>    | splicing factor 3b, subunit 2, 145kDa                                                  | 15                   | 1    | 16    |
| <i>EEF1D</i>    | eukaryotic translation elongation factor 1 delta (guanine nucleotide exchange protein) | 12                   | 1    | 13    |
| <i>TAGLN</i>    | Transgelin                                                                             | 13                   | 0    | 13    |
| <i>CD164L2</i>  | CD164 sialomucin-like 2                                                                | 11                   | 0    | 11    |
| <i>HAND1</i>    | heart and neural crest derivatives expressed 1                                         | 11                   | 0    | 11    |
| <i>KCND3</i>    | potassium voltage-gated channel, Shal-related subfamily, member 3                      | 11                   | 0    | 11    |
| <i>CEND1</i>    | cell cycle exit and neuronal differentiation 1                                         | 9                    | 1    | 10    |
| <i>IFI30</i>    | interferon, gamma-inducible protein 30                                                 | 2                    | 8    | 10    |
| <i>GPR173</i>   | G protein-coupled receptor 173                                                         | 9                    | 0    | 9     |
| <i>IRF7</i>     | interferon regulatory factor 7                                                         | 1                    | 5    | 6     |
| <i>PLEKHB1</i>  | pleckstrin homology domain containing, family B (evectins) member 1                    | 6                    | 0    | 6     |
| <i>ESR1</i>     | estrogen receptor 1                                                                    | 5                    | 0    | 5     |
| <i>KCNC3</i>    | potassium voltage-gated channel, Shaw-related subfamily, member 3                      | 5                    | 0    | 5     |
| <i>MIR147B</i>  | microRNA 147b                                                                          | 5                    | 0    | 5     |
| <i>RARA</i>     | retinoic acid receptor, alpha                                                          | 5                    | 0    | 5     |
| <i>FAM155B</i>  | family with sequence similarity 155, member B                                          | 2                    | 2    | 4     |
| <i>NRSN2</i>    | neurensin 2                                                                            | 4                    | 0    | 4     |
| <i>SLC17A8</i>  | solute carrier family 17 (vesicular glutamate transporter), member 8                   | 3                    | 1    | 4     |
| <i>MMRN2</i>    | multimerin 2                                                                           | 3                    | 0    | 3     |
| <i>RPL38</i>    | ribosomal protein L38                                                                  | 3                    | 0    | 3     |
| <i>ARAP3</i>    | ArfGAP with RhoGAP domain, ankyrin repeat and PH domain 3                              | 2                    | 0    | 2     |
| <i>FGFR1</i>    | fibroblast growth factor receptor 1                                                    | 0                    | 2    | 2     |
| <i>FOXP1</i>    | forkhead box P1                                                                        | 2                    | 0    | 2     |

|                     |                                          |   |   |   |
|---------------------|------------------------------------------|---|---|---|
| <i>LPIN1</i>        | lipin 1                                  | 2 | 0 | 2 |
| <i>MIR219-2</i>     |                                          | 0 | 2 | 2 |
| <i>AIM1L</i>        | absent in melanoma 1-like                | 1 | 0 | 1 |
| <i>HSF4</i>         | heat shock transcription factor 4        | 1 | 0 | 1 |
| <i>KLF9</i>         | Kruppel-like factor 9                    | 1 | 0 | 1 |
| <i>MCOLN3</i>       | mucolipin 3                              | 1 | 0 | 1 |
| <i>MYO7A</i>        | myosin VIIA                              | 1 | 0 | 1 |
| <i>PALM3</i>        | paralemmin 3                             | 1 | 0 | 1 |
| <i>PWWP2B</i>       | PWWP domain containing 2B                | 1 | 0 | 1 |
| <i>SGK223</i>       | homolog of rat pragma of Rnd2            | 1 | 0 | 1 |
| <i>STX16-NPEPL1</i> | STX16-NPEPL1 readthrough (NMD candidate) | 1 | 0 | 1 |
| <i>TRADD</i>        | TNFRSF1A-associated via death domain     | 1 | 0 | 1 |

## Supplemental Experimental Procedures

### Antibodies

Antibodies used for flow cytometry were as follows: (anti-mouse) Gr1 (Ly6G), B220 (RA3-682), CD34 (RAM34), FC $\gamma$ R (93) Sca-1 (D7), phospho-Stat5 from eBioscience; cKit (2B8), Mac-1 (CD11b) (M1/70), NK1.1 (PK136), Ter119 (Ter119,553673), CD3 (145-2C11), CD45.1 (A20), CD45.2 (104) all from BD Biosciences; and CD150 (TC-15-12F2.2) and CD48 (HM48-1); both from Biolegend. The 'lineage cocktail' included CD3, Gr-1, Mac-1 (CD11b), NK1.1, B220, and Terr-119. Anti-human antibodies include CD34-Pacific Blue (581) and CD90-allophycocyanin (5E10, both from Biolegend) and CD123-Alexa fluor 700 (32703, R&D).

### Quantitative real-time PCR

RNA was isolated with the RNeasy-Plus mini kit (Qiagen). The RNA was then used as a template for cDNA synthesis using the Verso cDNA kit (Thermoscientific). Quantitative real-time PCR reactions were carried out using SYBR Green MasterMix on an Applied Biosciences qPCR cyclor. Relative expression was determined by the  $\Delta / \Delta$  CT method and normalized to the internal control, GAPDH or Actin.

### ***AML1-ETO* transplants and treatment**

Mouse bone marrow or hematopoietic fetal liver derived cells transformed with *AML1-ETO-9a* or *AML1-ETO* and *NRAS<sup>G12D</sup>* with an IRES GFP element were provided by Stephen Nimer and Scott Lowe from previously published studies (Zuber et al., 2009) (Wang et al., 2011). Mice were treated with a doxorubicin and cytarabine regimen in same fashion as *Tet2<sup>-/-</sup>;Flt3<sup>TD</sup>* mice. Analysis performed a 4 weeks or time of sacrifice for morbidity.

### **RNA-sequencing analysis**

The raw output BAM files from the sequencer were first converted to FASTQ format using PICARD SamToFastq. Adapters were removed using cutadapt and any read shorter than 35bp was discarded. The trimmed reads were then mapped to the Mouse genome (MM9) using TopHat (ver 2) with a transcriptome index using the Ensembl GTF (ver 37.67) and specifying a strand specific library. Reads that were unmapped by TopHat were then re-mapped using BWA bwasm (ver 0.5.9) again to the mouse genome. The mapped reads from the two passes were merged and then quantitated with HTSeq-count with stranded and strict-intersection options. GSEA was performed per (Subramanian et al., 2005).

### **Exome-sequencing analysis**

DNA was prepared from *VTet2<sup>-/-</sup>Flt3<sup>TD</sup>* derived leukemia cells from the peripheral blood and somatic tail sample. Exome libraries were prepared by the Agilent SureSelectXT V4 51mb Exome kit. Leukemia mouse exomes were sequenced to a targeted average depth of 200x coverage and somatic samples to 100x coverage on an Illumina HiSeq 2500. We aligned the data through BWA and pre-processed it using GATK following standard recommendations. We used Mutect v 1.1.4 to infer single point variants and only kept the variants that pass the standard high confidence filters. We used Somatic Indel Detector v 2.3-9 to infer insertions and deletions (indels) and only considered indels that were supported by more than five reads. Both variants and indels were annotated using SnpEff v4.0e.

### **Differential Methylation Analysis**

Gene annotations were carried out by overlapping the CpG sites and regions with the exons, introns, UTR5, UTR3 and 5kb upstream regions of refseq genes for genome

assembly mm9. In addition to the pairwise comparisons, the cooperative effect between *Tet2* and *Flt3* mutations to the overall methylation was calculated using a logistic regression model with binomial distribution and a logit link function. CpG sites that showed significant p-values ( $p < 0.01$  after Benjamini-Hochberg correction) and at least 25% methylation contribution for the *Tet2:Flt3* interaction term were taken as synergistic. Methylation genes correlated with expression based on differential RNA-seq expression values and  $p < 0.1$ .

## Supplemental References

Subramanian, A., Tamayo, P., Mootha, V. K., Mukherjee, S., Ebert, B. L., Gillette, M. A., Paulovich, A., Pomeroy, S. L., Golub, T. R., Lander, E. S., and Mesirov, J. P. (2005). Gene set enrichment analysis: a knowledge-based approach for interpreting genome-wide expression profiles. *Proc Natl Acad Sci U S A* *102*, 15545-15550.

Wang, L., Gural, A., Sun, X. J., Zhao, X., Perna, F., Huang, G., Hatlen, M. A., Vu, L., Liu, F., Xu, H., *et al.* (2011). The leukemogenicity of AML1-ETO is dependent on site-specific lysine acetylation. *Science* *333*, 765-769.
